# Supplementary material for: Transcriptional gene network inference from a massive dataset elucidates transcriptome organization and gene function
Source: PubMed Central journal article supplement — Nucleic Acids Res. 2011 Jul 23;39(20):8677–88. doi: 10.1093/nar/gkr593 (PMC3203605; doi:10.1093/nar/gkr593), 2011-07-23
Supplement: supp_gkr593_nar-01122-n-2011-File012.pdf [file supp_gkr593_nar-01122-n-2011-File012.pdf]

## Supplementary Tables and Supplementary Table Legends

### Supplementary Table 1

Microarray experiments and hybridizations downloaded from ArrayExpress which were used to reverse-engineer the human and mouse gene networks.

### Supplementary Table 2

List of the genes associated to multiple probe-sets.

### Supplementary Table 3

List of genes associated to multiple probe-sets that are consistent.

### Supplementary Table 4

The top 1000 connections with the highest MI in the human network. Connections are sorted according with their Mutual Information. For each connection, we reported the *Probe ID* and *Gene Symbol* of the gene pair, along with the corresponding Mutual Information.

### Supplementary Table 5

Protein-protein interactions that have been tested via Yeast two Hybrid assays. Red highlights pairs of proteins whose physical interaction was already known from literature. Green highlights pairs of proteins whose physical interaction has been confirmed via Yeast two Hybrid assay.

### Supplementary Table 6

Human and mouse communities of genes obtained by applying a hierarchical clustering algorithm. For each community we report the list of genes composing it.

### Supplementary Table 7

Gene Ontology enriched for each of the communities. We report the significant Gene Ontology terms ( $P < 0.05$  after Bonferroni correction) along with their p-values computed as described in the Supplementary Experimental Procedures.

### Cellular Component: Lysosome

| P        | Probeset ID | Gene Symbol | Gene Info                                                |
|----------|-------------|-------------|----------------------------------------------------------|
| 7.89E-41 | 200701_at   | NPC2        | Niemann-Pick disease, type C2                            |
| 1.88E-36 | 211284_s_at | GRN         | granulin                                                 |
| 2.41E-34 | 200743_s_at | TPP1        | tripeptidyl peptidase I                                  |
| 7.74E-33 | 212663_at   | FKBP15      | FK506 binding protein 15, 133kDa                         |
| 3.76E-32 | 201212_at   | LGMN        | legumain                                                 |
| 7.10E-31 | 201494_at   | PRCP        | prolylcarboxypeptidase (angiotensinase C)                |
| 8.76E-31 | 218217_at   | SCPEP1      | serine carboxypeptidase 1                                |
| 5.99E-30 | 202944_at   | NAGA        | N-acetylgalactosaminidase, alpha-                        |
| 8.99E-30 | 217118_s_at | C22ORF9     | chromosome 22 open reading frame 9                       |
| 9.02E-30 | 204204_at   | SLC31A2     | solute carrier family 31 (copper transporters), member 2 |
| 2.31E-29 | 200871_s_at | PSAP        | prosaposin                                               |
| 9.49E-29 | 201944_at   | HEXB        | hexosaminidase B (beta polypeptide)                      |
| 2.73E-28 | 35820_at    | GM2A        | GM2 ganglioside activator                                |
| 3.67E-28 | 200839_s_at | CTSB        | cathepsin B                                              |
| 7.29E-28 | 202295_s_at | CTSH        | cathepsin H                                              |
| 7.29E-28 | 202838_at   | FUCA1       | fucosidase, alpha-L- 1, tissue                           |
| 8.89E-28 | 200748_s_at | FTH1        | ferritin, heavy polypeptide 1                            |
| 5.39E-27 | 202545_at   | PRKCD       | protein kinase C, delta                                  |
| 7.00E-27 | 202087_s_at | CTSL1       | cathepsin L1                                             |
| 8.61E-27 | 208704_x_at | APLP2       | amyloid beta (A4) precursor-like protein 2               |

### Biological process: Lysosome Organization

| P        | Probeset ID | Gene Symbol | Gene Info                                                          |
|----------|-------------|-------------|--------------------------------------------------------------------|
| 1.58E-09 | 200661_at   | CTSA        | cathepsin A                                                        |
| 7.17E-06 | 200742_s_at | TPP1        | tripeptidyl peptidase I                                            |
| 3.20E-05 | 207809_s_at | ATP6AP1     | ATPase, H <sup>+</sup> transporting, lysosomal accessory protein 1 |
| 3.48E-05 | 211284_s_at | GRN         | granulin                                                           |
| 2.10E-04 | 202545_at   | PRKCD       | protein kinase C, delta                                            |
| 2.25E-04 | 201050_at   | PLD3        | phospholipase D family, member 3                                   |
| 2.90E-04 | 200766_at   | CTSD        | cathepsin D                                                        |
| 3.73E-04 | 217118_s_at | C22ORF9     | chromosome 22 open reading frame 9                                 |
| 3.74E-04 | 219952_s_at | MCOLN1      | mucolipin 1                                                        |
| 4.58E-04 | 202812_at   | GAA         | glucosidase, alpha;                                                |
| 2.54E-03 | 208926_at   | NEU1        | sialidase 1 (lysosomal sialidase)                                  |
| 3.54E-03 | 205090_s_at | NAGPA       | N-acetylglucosamine-1-phosphodiester alpha-N-acetylglucosaminidase |
| 3.81E-03 | 200649_at   | NUCB1       | nucleobindin 1                                                     |
| 4.56E-03 | 218282_at   | EDEM2       | ER degradation enhancer, mannosidase alpha-like 2                  |
| 4.56E-03 | 219020_at   | HS1BP3      | HCLS1 binding protein 3                                            |
| 4.56E-03 | 203045_at   | NINJ1       | ninjurin 1                                                         |
| 4.56E-03 | 201494_at   | PRCP        | prolylcarboxypeptidase (angiotensinase C)                          |
| 4.56E-03 | 212647_at   | RRAS        | related RAS viral (r-ras) oncogene homolog                         |
| 4.56E-03 | 218217_at   | SCPEP1      | serine carboxypeptidase 1                                          |
| 4.56E-03 | 203167_at   | TIMP2       | TIMP metalloproteinase inhibitor 2                                 |

### Supplementary Table 8

The top 20 genes significantly associated to *Lysosome* (Cellular Component gene ontology class) or *Lysosome Organization* (Biological Process gene ontology class) resulting from the application of the guilty-by-association analysis, sorted according to the associated p-values.
